# Supplementary material for: Peimine, an Anti-Inflammatory Compound from Chinese Herbal Extracts, Modulates Muscle-Type Nicotinic Receptors
Source: MDPI journal article supplement (doi:10.3390/ijms222011287), 2021-10-19
Supplement: s1 [file s1]

SUPPLEMENTARY MATERIAL

# Peimine, an Anti-Inflammatory Compound from Chinese Herbal Extracts, Modulates Muscle-Type Nicotinic Receptors

Armando Alberola-Die <sup>1</sup>, José Antonio Encinar <sup>2</sup>, Raúl Cobo <sup>1</sup>, Gregorio Fernández-Ballester <sup>2</sup>, José Manuel González-Ros <sup>2</sup>, Isabel Ivorra <sup>1</sup> and Andrés Morales <sup>1,\*</sup>

<sup>1</sup> División de Fisiología, Departamento de Fisiología, Genética y Microbiología, Universidad de Alicante, Apdo. 99, E-03080 Alicante, Spain; alberoladie.armando@ua.es (A.A.-D.); raulcobo22@gmail.com (R.C.); isabel.ivorra@ua.es (I.I.)

<sup>2</sup> Instituto de Investigación, Desarrollo e Innovación en Biotecnología Sanitaria de Elche (IDiBE), Universidad Miguel Hernández, E-03202 Elche, Spain; jant.encinar@umh.es (J.A.E.); gregorio@umh.es (G.F.-B.); gonzalez.ros@umh.es (J.M.G.-R.)

\* Correspondence: andres.morales@ua.es; Tel.: +34-96-590-3949

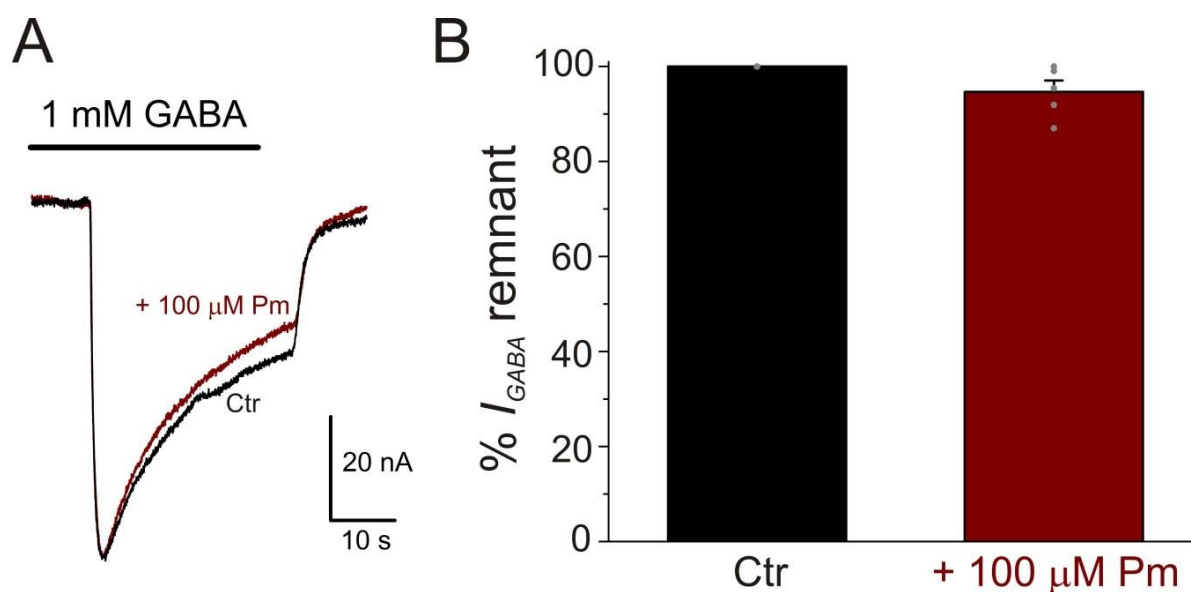

**Supplementary Figure S1.** Lack of effect of Pm on GABA-elicited currents ( $I_{GABA}$ ). **A.** Super-imposed  $I_{GABA}$ s elicited by 1 mM GABA alone (black recording) or together with 100  $\mu$ M Pm (red trace) in an oocyte previously injected with synaptosomal-enriched rat-brain membranes. Notice that Pm, even at concentrations as high as 100  $\mu$ M, did not attenuate  $I_{GABA}$ . **B.** Column graph showing the percentage of  $I_{GABA}$  in the control (black) and Pm (red) groups. There was not significant differences between both groups ( $p < 0.05$ ,  $t$ -test). Data are from 5 oocytes of 3 donor frogs.

**Scheme 1.** Putative nAChR residues interacting with Pm in the open and the closed conformation, as predicted from molecular docking simulations.

| nAChR State | Dmain | Pm Cluter | Binding energy (Kcal/mo) | Residues (subunit name-residue name-number)                                                                                                                          |
|-------------|-------|-----------|--------------------------|----------------------------------------------------------------------------------------------------------------------------------------------------------------------|
| OPEN        | TMD   | 1         | -10.12                   | β (A258, V261, F262, L265), γ (L265, A266, V269, F270, L273), αγ (V255, F256, V259, E262, I263), δ (F266, L267, Q270)                                                |
|             |       | 2         | -10.57                   | αδ (T244, L245, I247, S248), β (S250, I253, S254, L257, A258, V261, F262), γ (C262, L265, A266, V269, F270), αγ (S248, L251, S252, V255), δ (T252, S256, L259)       |
|             |       | 3         | -11.24                   | αγ (Y213, F214, N217, V218, I220, P221, I260, L263, I264, T267), δ (F266, A269, Q270, P273, L277, L281, L286, M290)                                                  |
|             |       | 4         | -11.06                   | αδ (F135, F137, I210, F214, V215, V218, I219, C222, I260, I264, Y277, F280, T281, F284, V285, A427, G428, I431, E432)                                                |
|             |       | 5         | -10.82                   | δ (F134, L219, Y221, I222, I225, I226, C229, V230, V272, S276, Y285, L286, F288, V289, V292, A464, I465, T468)                                                       |
|             |       | 6         | -10.71                   | β (E45, F135, Q185, W186, R215, P217, F219, Y220, I221, T224, V270, T273, S274, V277, P278, I279, I280, I281, Y283, L284), γ (L283)                                  |
|             |       | 7         | -10.68                   | γ (E47, F137, F139, W141, R223, K224, P225, Y228, V229, F232, I233, L278, T281, V285, L287, Y291, F294, I295, F471, F478)                                            |
|             |       | 8         | -10.56                   | αδ (I219, C222, L223, F225, S226, T229, V230, F233, F284, V285, S287, S288, V291, I417, I420, G421, S424, V425, G428)                                                |
|             |       | 9         | -10.42                   | γ (F137, R223, P225, Y228, V229, F232, I233, C236, L278, T281, V285, L287, Y291, L292, F294, I295, F471)                                                             |
|             |       | 10        | -10.29                   | αγ (F135, F137, F214, V218, I219, C222, I264, L273, Y277, M278, F280, T281, F284, S424, V425, G428, R429, I431)                                                      |
|             |       | 11        | -10                      | β (Y220, I221, Y223, T224, P227, L266, K269, V270, E272, T273), γ (L273, Q276, P279, E280, L283)                                                                     |
|             |       | 12        | -9.87                    | αγ (E175, P211, Y213, F214, N217, L263, S266, T267), δ (F266, A269, Q270, K271, P273, E274, L277, L281, M290)                                                        |
|             |       | 13        | -9.3                     | γ (E186, N187, G188, E189, W190, P225, L226, F227), αγ (V46, N47, Q48, Y127, I130, V132, S269, P272)                                                                 |
|             | ECD   | 14        | -11.97                   | γ (S40, N55, W57, P123), αγ (V91, Y93, N94, A96, W149, T150, Y151, D152, P197, Y198)                                                                                 |
|             |       | 15        | -10.89                   | αδ (V91, L92, Y93, A96, I148, W149, T150, Y190, C192, C193, Y198), δ (T35, T37, N52, W54, E56, Y116, L118, P120)                                                     |
|             |       | 16        | -10.72                   | αδ (I148, W149, T150, Y151, D152, Y190, P197, Y198), δ (T35, W54, R78, L108, Y116, L118, E175)                                                                       |
|             |       | 17        | -10.49                   | αδ (L87, P88, D89, L90, V91, A96, G98, D99, F100, V103, H104, M105, W118, W149), δ (V101, Y104, P120)                                                                |
| CLOSED      | TMD   | 1         | -11.2                    | αδ (T244, L245, I247, S248, L251), β (I253, S254, L257, A258, V261, F262), γ (C262, L265, A266, V269, F270), αγ (S248, L251, S252, V255), δ (T252, S256, L259, I263) |
|             |       | 2         | -12.87                   | β (Q185, L218, F219, Y220, V222, Y223), γ (T48, V134, A282, L283, A284, V285, P286, L287, I288, G289, L292, M293, M296)                                              |
|             |       | 3         | -11.49                   | β (F135, Q185, P217, F219, Y220, I221, T224, K269, V270, T273, S274, V277, P278, I279, I280, I281, Y283, L284, I287), γ (L283)                                       |
|             |       | 4         | -10.87                   | δ (F134, F136, K217, L219, Y221, I222, I225, I226, V272, P273, S276, L281, I282, Y285, L286, V289, I465, T468)                                                       |
|             |       | 5         | -10.84                   | αγ (F135, F137, I210, F214, V215, V218, I219, C222, I264, L273, Y277, M278, F280, T281, F284, S424, V425, G428, R429)                                                |
|             |       | 6         | 10.75                    | αγ (F135, F137, I210, F214, V215, V218, I219, L273, Y277, M278, F280, T281, F284, G421, S424, V425, G428, R429)                                                      |
|             |       | 7         | -10.18                   | β (P242, P243, D244, A245, G246, E247, M249, L304, H305, H306, R307, S308, T311, H312, Y430, V431, A432, A435, D436), γ (P317, S318)                                 |
|             |       | 8         | -10.17                   | αδ (F137, I210, F214, V215, V218, I219, C222, L223, F225, S226, F280, F284, G421, T422, S424, V425, G428)                                                            |
|             |       | 9         | -10.11                   | αδ (F137, I210, F214, V215, V218, I219, C222, L223, F225, Y277, F280, T281, F284, G421, T422, S424, V425)                                                            |
|             |       | 10        | -9.61                    | αγ (E172, S173, G174, E175, P211, Y213, V271), δ (K45, E46, A130, V131, S276, L277, N278, V279, P280, L281)                                                          |
|             | ECD   | 11        | -11.52                   | αδ (L87, P88, D89, L90, V91, L92, A96, D97, G98, D99, F100, V103, H104, W118, F124, W149), δ (V101, P120)                                                            |
|             |       | 12        | -10.98                   | γ (S40, N55, W57, V104, P123), αγ (V91, Y93, I148, W149, T150, Y151, D152, P197, Y198)                                                                               |
|             |       | 13        | -10.6                    | αδ (V91, L92, Y93, N94, I148, W149, T150, Y190, Y198), δ (T35, T37, W54, E56, Y116, L118, P120)                                                                      |
|             |       | 14        | -10.39                   | γ (W57, V104, P123, I125), αγ (D89, L90, V91, L92, Y93, N94, N95, A96, D99, F100, I148, W149, Y198)                                                                  |

---

|    |        |                                                                                                                              |
|----|--------|------------------------------------------------------------------------------------------------------------------------------|
| 15 | -10.34 | $\gamma$ (S40, N41, N55, W57, P123), $\alpha\gamma$ (V91, L92, Y93, N94, N95, A96, G147, I148, W149, T150, Y190, P197, Y198) |
| 16 | -9.59  | $\alpha\gamma$ (E2, E4, L7, V8, L11, A70, D71, G74, I75, I78, R79, L80, P81), $\delta$ (R17, L24, Y150)                      |

---
